# Supplementary material for: Volatile Metabolites from Brevundimonas diminuta and Nematicidal Esters Inhibit Meloidogyne javanica
Source: MDPI journal article supplement (doi:10.3390/microorganisms11040966), 2023-04-07
Supplement: s1 [file s1]

Supplementary materials

## **Volatile Metabolites from *Brevundimonas diminuta* and Nematicidal Esters Inhibit *Meloidogyne javanica***

Yongxiang Sun, Yuan Ran, Hanbo Yang, Minghe Mo \* and Guohong Li \*

State key Laboratory for Conservation and Utilization of Bio-Resources in Yunnan,  
School of Life Sciences, Yunnan University, Kunming, Yunnan 650091, China

\* Correspondence: ligh@ynu.edu.cn (G.L.); minghemo@163.com (M.M.)

### Content

1. Table S1
2. Table S2
3. Table S3
4. Figure S1
5. Figure S2

**Table S1.** Forty-two volatile organic compounds identified from *B. diminuta* via GC-MS.

| No. | Compounds                                                                      | CAS No.    | RT(min) | Area % | Qual % |
|-----|--------------------------------------------------------------------------------|------------|---------|--------|--------|
| 1   | hexanal                                                                        | 66-25-1    | 4.04    | 0.30   | 90     |
| 2   | N,N-dimethylcyclohexanamine                                                    | 98-94-2    | 9.78    | 0.50   | 91     |
| 3   | butyl butanoate                                                                | 109-21-7   | 10.61   | 0.45   | 91     |
| 4   | butylcyclohexane                                                               | 1678-93-9  | 11.97   | 0.35   | 97     |
| 5   | nonanal                                                                        | 124-19-6   | 15.35   | 0.22   | 96     |
| 6   | butoxycyclohexane                                                              | 24072-44-4 | 15.67   | 0.43   | 94     |
| 7   | 1-phenylpropan-2-one                                                           | 103-79-7   | 16.28   | 0.31   | 94     |
| 8   | 2-propylhept-2-enal                                                            | 34880-43-8 | 18.45   | 0.25   | 92     |
| 9   | dodecane                                                                       | 112-40-3   | 19.00   | 0.30   | 94     |
| 10  | cyclohexylcyclohexane                                                          | 92-51-3    | 22.33   | 0.67   | 96     |
| 11  | tetradecane                                                                    | 629-59-4   | 25.31   | 0.84   | 98     |
| 12  | cyclohexyl hexanoate                                                           | 6243-10-3  | 26.03   | 0.24   | 80     |
| 13  | 2,6-ditert-butylcyclohexa-2,5-diene-1,4-dione                                  | 719-22-2   | 27.24   | 0.46   | 90     |
| 14  | cyclohexylidenecyclohexane                                                     | 4233-18-5  | 28.42   | 0.39   | 83     |
| 15  | 2-(cyclohexen-1-yl)cyclohexan-1-one                                            | 1502-22-3  | 28.73   | 0.55   | 83     |
| 16  | 3-methylpentadecane                                                            | 2882-96-4  | 29.86   | 0.32   | 90     |
| 17  | 2-(1-hydroxycyclohexyl)cyclohexan-1-one                                        | 28746-99-8 | 30.76   | 0.88   | 86     |
| 18  | heptadecane                                                                    | 629-78-7   | 32.96   | 0.30   | 97     |
| 19  | 2,6,10,14-tetramethylpentadecane                                               | 1921-70-6  | 33.10   | 0.24   | 98     |
| 20  | dibutyl benzene-1,2-dicarboxylate                                              | 84-74-2    | 38.77   | 0.56   | 96     |
| 21  | N-phenylnaphthalen-1-amine                                                     | 90-30-2    | 44.08   | 0.22   | 87     |
| 22  | (2,5-dimethoxy-4-propan-2-ylphenyl)methanol                                    | 62458-52-0 | 47.47   | 0.28   | 80     |
| 23  | bis(6-methylheptyl) benzene-1,2-dicarboxylate                                  | 27554-26-3 | 49.52   | 6.99   | 91     |
| 24  | 9-methylnonadecane                                                             | 13287-24-6 | 51.71   | 0.53   | 95     |
| 25  | (6E,10E,14E,18E)-2,6,10,15,19,23-hexamethyltetracosane-2,6,10,14,18,22-hexaene | 111-02-4   | 53.68   | 0.31   | 98     |
| 26  | nonacosane                                                                     | 630-03-5   | 54.77   | 0.59   | 99     |
| 27  | hexadecane                                                                     | 544-76-3   | 30.59   | 0.71   | 96     |
| 28  | octadecane                                                                     | 593-45-3   | 35.24   | 0.39   | 94     |
| 29  | undecylcyclopentane                                                            | 6785-23-5  | 36.59   | 0.33   | 90     |
| 30  | hexadecanoic acid                                                              | 57-10-3    | 39.11   | 2.34   | 99     |
| 31  | icosane                                                                        | 112-95-8   | 39.46   | 0.29   | 99     |
| 32  | heneicosane                                                                    | 629-94-7   | 41.44   | 0.38   | 99     |
| 33  | hexadecanamide                                                                 | 629-54-9   | 43.13   | 0.40   | 94     |
| 34  | docosane                                                                       | 629-97-0   | 43.32   | 0.40   | 99     |
| 35  | (Z)-octadec-9-enamide                                                          | 301-02-0   | 46.38   | 1.32   | 99     |
| 36  | tetracosane                                                                    | 646-31-1   | 46.87   | 0.52   | 99     |
| 37  | hexacosane                                                                     | 630-01-3   | 50.17   | 0.54   | 99     |
| 38  | (Z)-docos-13-enamide                                                           | 112-84-5   | 53.03   | 1.31   | 99     |
| 39  | nonadecane                                                                     | 629-92-5   | 56.58   | 0.73   | 96     |

|    |             |          |       |      |    |
|----|-------------|----------|-------|------|----|
| 40 | pentacosane | 629-99-2 | 58.72 | 0.80 | 97 |
| 41 | octacosane  | 630-02-4 | 61.32 | 0.68 | 99 |
| 42 | triacontane | 638-68-6 | 68.34 | 0.55 | 97 |

**Table S2.** Commercial information of 10 VOCs used to test nematocidal activity.

| N<br>o. | Components                                                                      | CAS No.    | Product code | Purity | Brand   |
|---------|---------------------------------------------------------------------------------|------------|--------------|--------|---------|
| 1       | butyl butanoate                                                                 | 109-21-7   | B802161      | 99.0 % | Macklin |
| 2       | 2-(1-hydroxycyclohexyl)cyclohexan-1-one                                         | 28746-99-8 | H908848      | 95.0 % | Macklin |
| 3       | 2-(cyclohexen-1-yl)cyclohexan-1-one                                             | 1502-22-3  | C806024      | 85.0 % | Macklin |
| 4       | tetradecane                                                                     | 629-59-4   | T818478      | 98.0 % | Macklin |
| 5       | butylcyclohexane                                                                | 1678-93-9  | B871393      | 99.0 % | Macklin |
| 6       | dodecane                                                                        | 112-40-3   | D807186      | 98.0 % | Macklin |
| 7       | bis(6-methylheptyl) benzene-1,2-dicarboxylate                                   | 27554-26-3 | D822209      | 99.0 % | Macklin |
| 8       | dibutyl benzene-1,2-dicarboxylate                                               | 84-74-2    | D806672      | 98.5 % | Macklin |
| 9       | (6E,10E,14E,18E)-2,6,10,15,19,23-hexamethyl<br>tetracos-2,6,10,14,18,22-hexaene | 111-02-4   | S817864      | 98.0 % | Macklin |
| 10      | cyclohexylcyclohexane                                                           | 92-51-3    | B802413      | 99.0 % | Macklin |

**Table S3.** Thirty-eight butyl-butyrate-like volatile esters and commercial information.

| No. | Compounds                           | CAS No.     | Formula                                        | Product code | Purity | Brand    |
|-----|-------------------------------------|-------------|------------------------------------------------|--------------|--------|----------|
| 1   | methyl 3-methylbutanoate            | 556-24-1    | C <sub>6</sub> H <sub>12</sub> O <sub>2</sub>  | 65356A       | 98 %   | Adamas   |
| 2   | dimethyl octanedioate               | 1732-09-8   | C <sub>10</sub> H <sub>18</sub> O <sub>4</sub> | D840213      | 98 %   | Macklin  |
| 3   | ethyl 4-methylpentanoate            | 25415-67-2  | C <sub>8</sub> H <sub>16</sub> O <sub>2</sub>  | E915660      | 97 %   | Macklin  |
| 4   | ethyl 3-methylbut-2-enoate          | 638-10-8    | C <sub>7</sub> H <sub>12</sub> O <sub>2</sub>  | E835450      | 98 %   | Macklin  |
| 5   | dibutyl propanedioate               | 1190-39-2   | C <sub>11</sub> H <sub>20</sub> O <sub>4</sub> | D862583      | 99 %   | Macklin  |
| 6   | pentanoyl pentanoate                | 2082-59-9   | C <sub>10</sub> H <sub>18</sub> O <sub>3</sub> | V831004      | 98 %   | Macklin  |
| 7   | dipropyl 2-yl butanedioate          | 924-88-9    | C <sub>10</sub> H <sub>18</sub> O <sub>4</sub> | D830992      | 98 %   | Macklin  |
| 8   | diethyl nonanedioate                | 624-17-9    | C <sub>13</sub> H <sub>24</sub> O <sub>4</sub> | D875497      | 90 %   | Macklin  |
| 9   | propyl octanoate                    | 624-13-5    | C <sub>11</sub> H <sub>22</sub> O <sub>2</sub> | P860117      | 98 %   | Macklin  |
| 10  | ethyl tridecanoate                  | 28267-29-0  | C <sub>15</sub> H <sub>30</sub> O <sub>2</sub> | E863573      | 97 %   | Macklin  |
| 11  | ethyl 2-ethylbutanoate              | 2983-38-2   | C <sub>8</sub> H <sub>16</sub> O <sub>2</sub>  | E871329      | 99 %   | Macklin  |
| 12  | butyl dodecanoate                   | 106-18-3    | C <sub>16</sub> H <sub>32</sub> O <sub>2</sub> | B835399      | 99 %   | Macklin  |
| 13  | ethyl pent-4-enoate                 | 1968-40-7   | C <sub>7</sub> H <sub>12</sub> O <sub>2</sub>  | E836291      | 98 %   | Macklin  |
| 14  | 6-ethoxy-6-oxohexanoic acid         | 626-86-8    | C <sub>8</sub> H <sub>14</sub> O <sub>4</sub>  | A800107      | 97 %   | Macklin  |
| 15  | dimethyl butanedioate               | 106-65-0    | C <sub>6</sub> H <sub>10</sub> O <sub>4</sub>  | D822886      | 99.5 % | Macklin  |
| 16  | diethyl butanedioate                | 123-25-1    | C <sub>8</sub> H <sub>14</sub> O <sub>4</sub>  | D806708      | 99.0 % | Macklin  |
| 17  | ethyl 6-oxohexanoate                | 27983-42-2  | C <sub>8</sub> H <sub>14</sub> O <sub>3</sub>  | BD00756426   | -      | Fujifilm |
| 18  | ethyl 4-oxopentanoate               | 539-88-8    | C <sub>7</sub> H <sub>12</sub> O <sub>3</sub>  | E809207      | 99 %   | Macklin  |
| 19  | 5-heptyloxolan-2-one                | 104-67-6    | C <sub>11</sub> H <sub>20</sub> O <sub>2</sub> | U820339      | 98 %   | Macklin  |
| 20  | methyl heptanoate                   | 106-73-0    | C <sub>8</sub> H <sub>16</sub> O <sub>2</sub>  | M859147      | 99.0 % | Macklin  |
| 21  | 5-butyloxolan-2-one                 | 104-50-7    | C <sub>8</sub> H <sub>14</sub> O <sub>2</sub>  | O815306      | 99 %   | Macklin  |
| 22  | ethyl 2-methylpentanoate            | 39255-32-8  | C <sub>8</sub> H <sub>16</sub> O <sub>2</sub>  | E808991      | 98 %   | Macklin  |
| 23  | octyl acetate                       | 112-14-1    | C <sub>10</sub> H <sub>20</sub> O <sub>2</sub> | O815140      | 98%    | Macklin  |
| 24  | ethyl octanoate                     | 106-32-1    | C <sub>10</sub> H <sub>20</sub> O <sub>2</sub> | E808629      | 99 %   | Macklin  |
| 25  | methyl 2-(oxan-4-yl)acetate         | 156002-64-1 | C <sub>8</sub> H <sub>14</sub> O <sub>3</sub>  | M854828      | 95 %   | Macklin  |
| 26  | methyl undecanoate                  | 1731-86-8   | C <sub>12</sub> H <sub>24</sub> O <sub>2</sub> | M875207      | 98 %   | Macklin  |
| 27  | prop-2-enyl heptanoate              | 142-19-8    | C <sub>10</sub> H <sub>18</sub> O <sub>2</sub> | A832229      | 98%    | Macklin  |
| 28  | methyl decanoate                    | 110-42-9    | C <sub>11</sub> H <sub>22</sub> O <sub>2</sub> | M813292      | 98 %   | Macklin  |
| 29  | bis(2-ethylhexyl) hexanedioate      | 103-23-1    | C <sub>22</sub> H <sub>42</sub> O <sub>4</sub> | B802127      | 99%    | Macklin  |
| 30  | ethyl heptanoate                    | 106-30-9    | C <sub>9</sub> H <sub>18</sub> O <sub>2</sub>  | E808593      | 98.5 % | Macklin  |
| 31  | diethyl decanedioate                | 110-40-7    | C <sub>14</sub> H <sub>26</sub> O <sub>4</sub> | D806720      | 98 %   | Macklin  |
| 32  | diethyl 4-oxoheptanedioate          | 6317-49-3   | C <sub>11</sub> H <sub>18</sub> O <sub>5</sub> | D837957      | 98%    | Macklin  |
| 33  | ethyl 2-methylbutanoate             | 7452-79-1   | C <sub>7</sub> H <sub>14</sub> O <sub>2</sub>  | E809208      | 98 %   | Macklin  |
| 34  | dibutyl decanedioate                | 109-43-3    | C <sub>18</sub> H <sub>34</sub> O <sub>4</sub> | D807216      | 98 %   | Macklin  |
| 35  | ethyl (3S)-3-hydroxybutanoate       | 56816-01-4  | C <sub>6</sub> H <sub>12</sub> O <sub>3</sub>  | E834909      | 98%    | Macklin  |
| 36  | 3-methylbutyl<br>2-methylpropanoate | 2050-01-3   | C <sub>9</sub> H <sub>18</sub> O <sub>2</sub>  | I859350      | 99 %   | Macklin  |
| 37  | methyl octanoate                    | 111-11-5    | C <sub>9</sub> H <sub>18</sub> O <sub>2</sub>  | M824130      | 99 %   | Macklin  |
| 38  | dimethyl pentanedioate              | 1119-40-0   | C <sub>7</sub> H <sub>12</sub> O <sub>4</sub>  | D806569      | 98 %   | Macklin  |

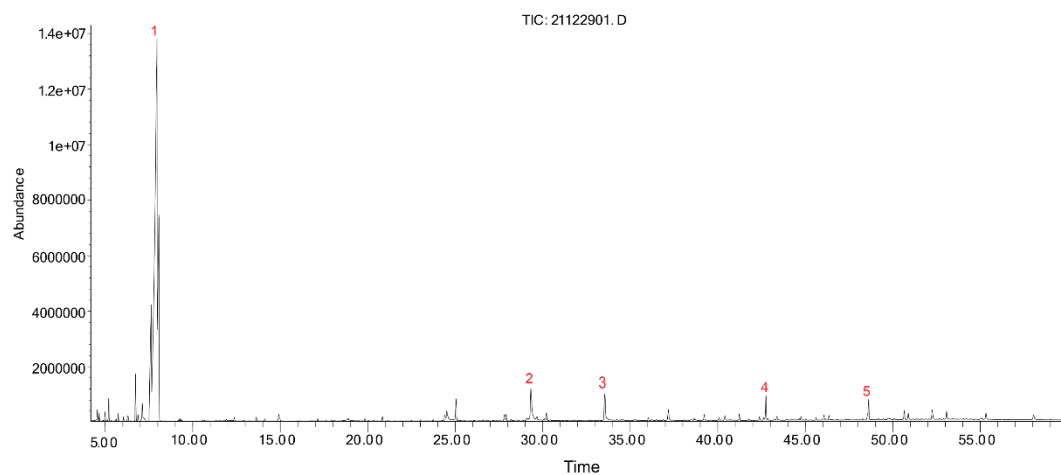

**Figure S1** The GC-MS chromatogram of NB medium

**1:** cyclohexanol; **4:** methyl (Z)-octadec-9-enoate; **5:** dioctyl benzene-1,2-dicarboxylate; **2,3:** not identified.

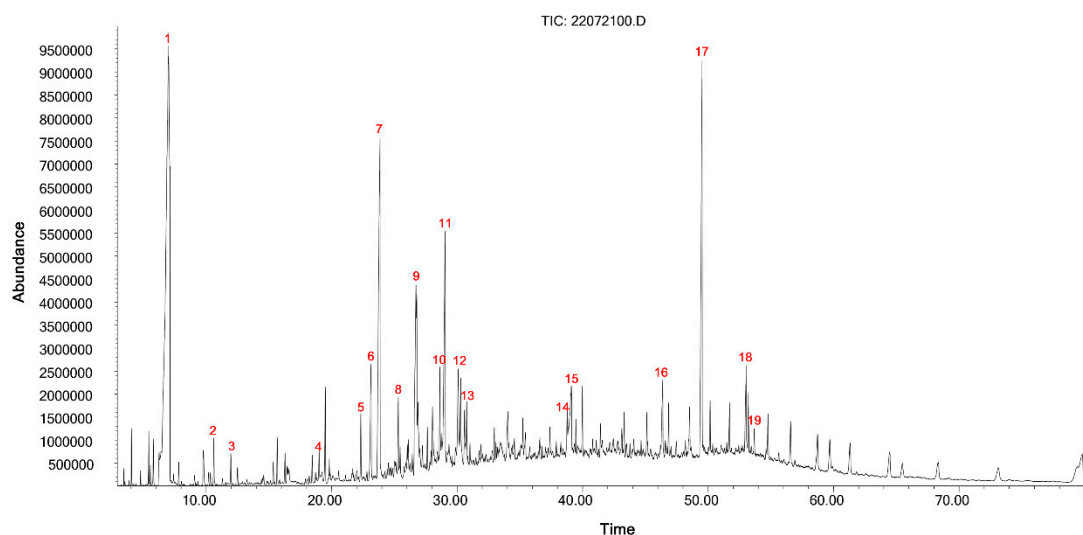

**Figure S2** The GC-MS chromatogram of *B. diminuta*

**1:** cyclohexanol; **2:** butyl butanoate; **3:** butylcyclohexane; **4:** dodecane; **5:** cyclohexylcyclohexane; **6:** cyclohexyl pentanoate; **7:** cyclohexyloxycyclohexane; **8:** tetradecane; **10:** 2-(cyclohexen-1-yl)cyclohexan-1-one; **13:** 2-(1-hydroxycyclohexyl)cyclohexan-1-one; **14:** dibutyl benzene-1,2-dicarboxylate; **15:** hexadecanoic acid; **16:** octadec-9-enamide; **17:** bis(6-methylheptyl) benzene-1,2-dicarboxylate; **18:** (Z)-docos-13-enamide; **19:** (6E,10E,14E,18E)-2,6,10,15,19,23-hexamethyltetracos-2,6,10,14,18,22-hexaene; **9, 11, 12:** not identified.
